# Supplementary material for: Impact of Anti-VEGF Treatment and Patient Characteristics on Vision Outcomes in Neovascular Age-related Macular Degeneration: Up to 6-Year Analysis of the AAO IRIS® Registry
Source: PubMed Central journal article supplement — Ophthalmol Sci. 2023 Oct 31;4(2):100421. doi: 10.1016/j.xops.2023.100421 (PMC10767511; doi:10.1016/j.xops.2023.100421), 2023-10-31
Supplement: mmc1.pdf [file mmc1.pdf]

**A. Number of anti-VEGF injections per year<sup>a</sup>**

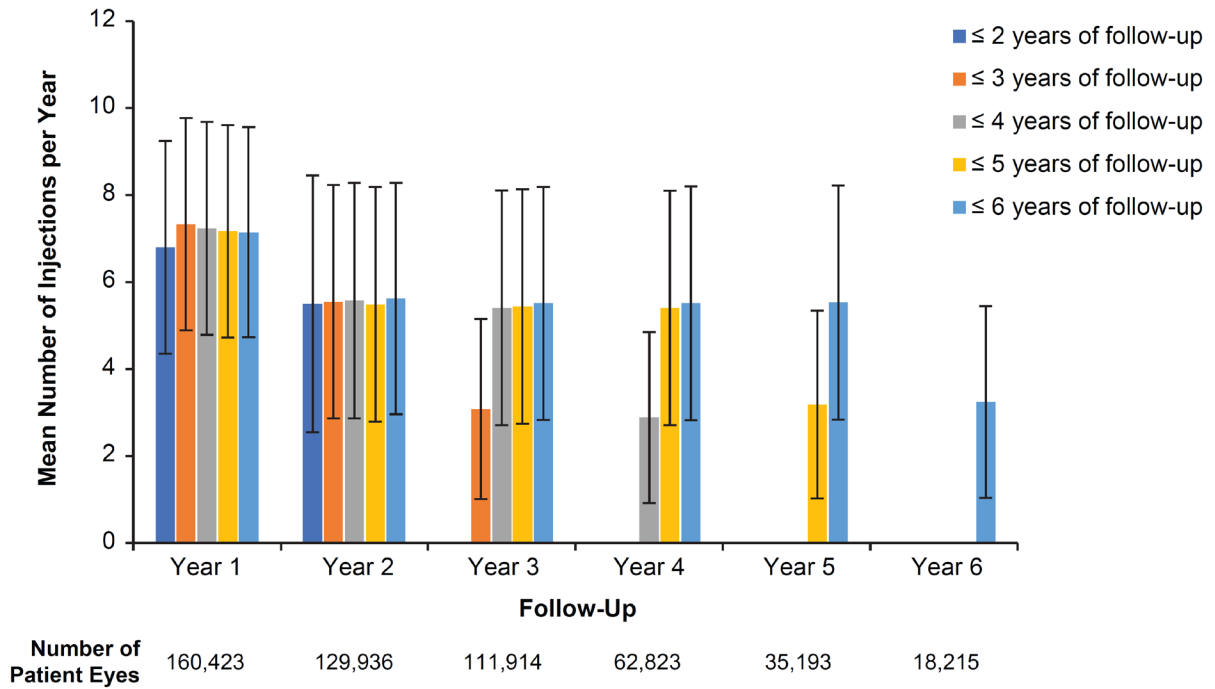

**B. Mean interval between of anti-VEGF injections<sup>a</sup>**

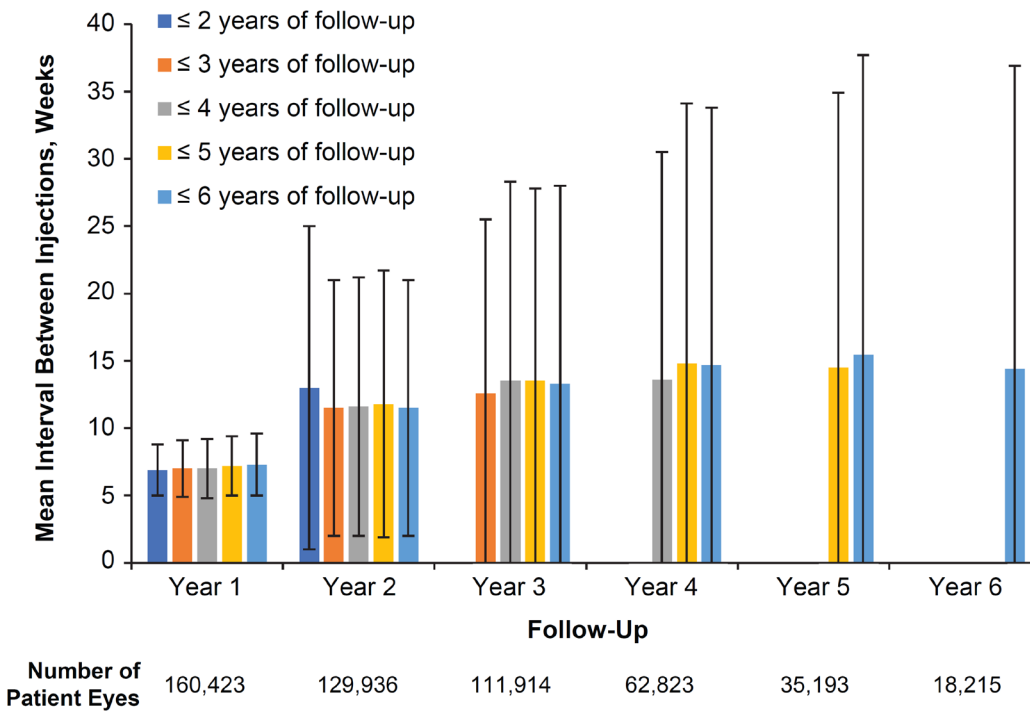

**Figure S4.** Treatment patterns in the overall cohort for patients with at least 2 years' follow-up. **(A)** Injection frequency over time as the mean number of anti-VEGF intravitreal injections over follow-up years 1 through 6 according to the number of years of follow-up. **(B)** Intervals

between treatments as the mean number weeks between injections over follow-up years 1 through 6 according to the number of years of patients' follow-up.

<sup>a</sup> As part of this study's inclusion exclusion criteria, patients were required to contribute a minimum of 2 years of follow-up, therefore there are no patients with 1 year of follow-up.

VEGF = vascular endothelial growth factor.

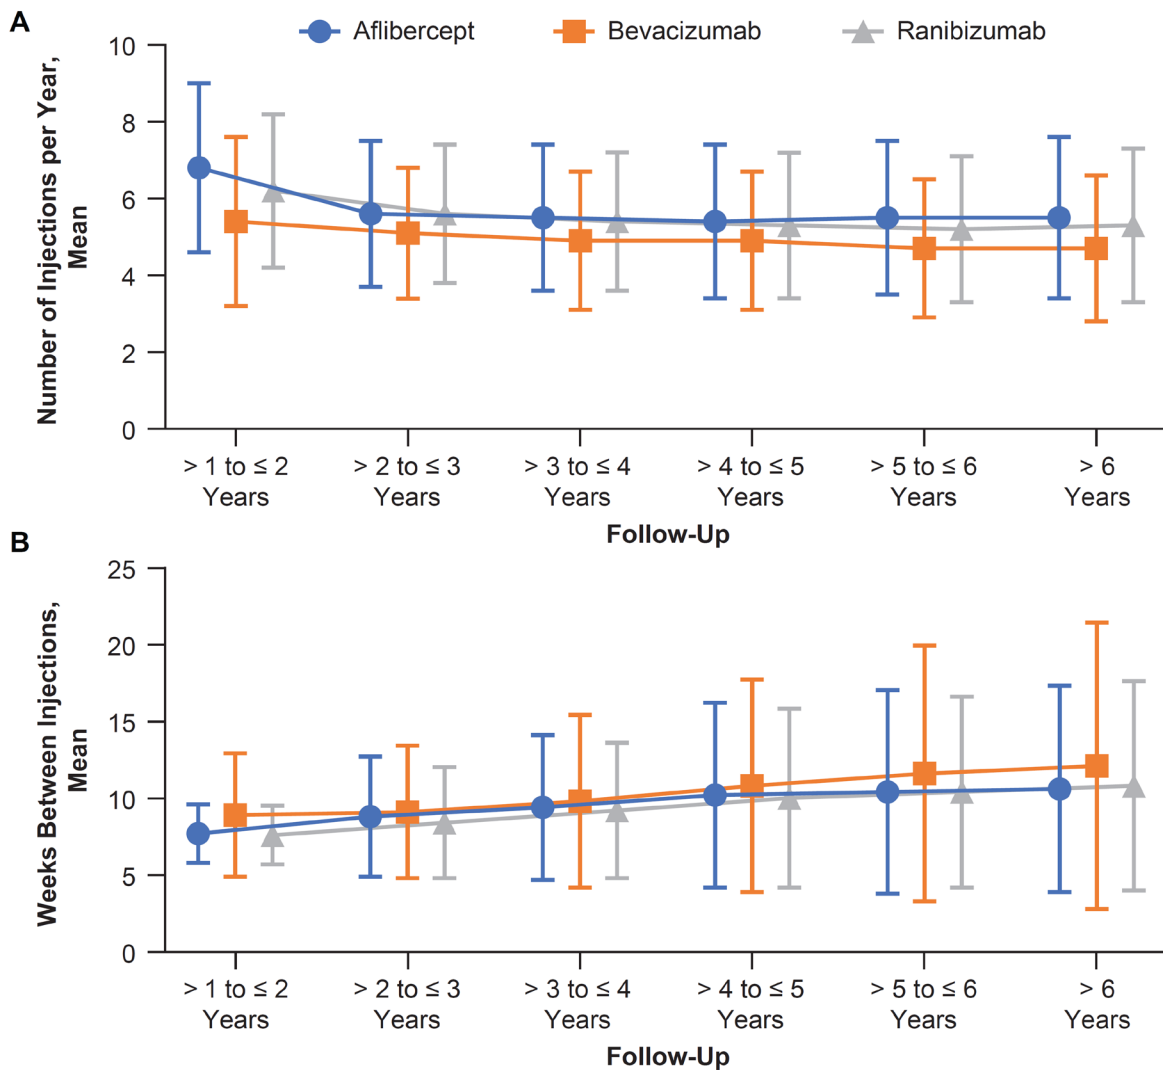

**Figure S6.** Treatment patterns by anti-VEGF agent<sup>a</sup> (aflibercept, bevacizumab, or ranibizumab) in the overall cohort for patients with at least 2 years' follow-up. **(A)** Injection frequency over time as the mean number of anti-VEGF intravitreal injections. **(B)** Interval between treatments as the mean number of weeks between injections.

<sup>a</sup> Excludes patients treated with more than 1 anti-VEGF agent during the follow-up period.

VEGF = vascular endothelial growth factor.
