# Supplementary material for: Impact of Anti-VEGF Treatment and Patient Characteristics on Vision Outcomes in Neovascular Age-related Macular Degeneration: Up to 6-Year Analysis of the AAO IRIS® Registry
Source: PubMed Central journal article supplement — Ophthalmol Sci. 2023 Oct 31;4(2):100421. doi: 10.1016/j.xops.2023.100421 (PMC10767511; doi:10.1016/j.xops.2023.100421), 2023-10-31
Supplement: mmc2.pdf [file mmc2.pdf]

## Supplemental Materials

**Table S1.** ICD-9 and ICD-10 Codes Utilized to Identify a Diagnosis of nAMD

| Codes for “Exudative Age-Related Macular Degeneration” |                   |                                                              |
|--------------------------------------------------------|-------------------|--------------------------------------------------------------|
| Code Type                                              | ICD-9/ICD-10 Code | Code Description                                             |
| ICD-10                                                 | H35.321*          | Exudative age-related macular degeneration,<br>right eye     |
| ICD-10                                                 | H35.322*          | Exudative age-related macular degeneration, left<br>eye      |
| ICD-10                                                 | H35.323*          | Exudative age-related macular degeneration,<br>bilateral eye |
| ICD-9                                                  | 362.52            | Exudative senile macular degeneration                        |

\* A wildcard was used to allow any digit as the final digit of the ICD-9/ICD-10 code.

ICD-9 and ICD-10 = International Classification of Diseases 9<sup>th</sup> and 10<sup>th</sup> Revisions; nAMD = neovascular age-related macular degeneration.

**Table S3.** Adjusted Cox proportional hazard model for estimating time to visual acuity 10 ETDRS letter loss (CVL) over 6 years for all eligible patient eyes (n = 160,423)

| <b>Risk Factors</b>             | <b>n</b> | <b>%</b> | <b>Hazard ratio</b> | <b>Hazard ratio Lower 95% CI</b> | <b>Hazard ratio Upper 95% CI</b> | <b>P-values</b> |
|---------------------------------|----------|----------|---------------------|----------------------------------|----------------------------------|-----------------|
| <b>Gender</b>                   |          |          |                     |                                  |                                  |                 |
| Female                          | 58,959   | 62.81    | Ref.                | -                                | -                                | -               |
| Male                            | 34,545   | 36.80    | 1.03                | 1.01                             | 1.04                             | <0.001          |
| <b>Payer Type</b>               |          |          |                     |                                  |                                  |                 |
| Medicare                        | 72,898   | 77.66    | Ref.                | -                                | -                                | -               |
| Commercial                      | 14,599   | 15.55    | 1.00                | 0.98                             | 1.02                             | 0.90            |
| Medicaid                        | 1012     | 1.08     | 1.07                | 1.00                             | 1.14                             | 0.05            |
| Other                           | 5,361    | 5.72     | 0.98                | 0.95                             | 1.01                             | 0.14            |
| <b>Physician Subspecialty</b>   |          |          |                     |                                  |                                  |                 |
| Retina Specialist               | 76,592   | 81.59    | Ref.                | -                                | -                                | -               |
| Other                           | 17,278   | 18.41    | 1.05                | 1.03                             | 1.07                             | <0.001          |
| <b>Historical Comorbidities</b> |          |          |                     |                                  |                                  |                 |
| Glaucoma                        | 11,376   | 7.69     | 1.16                | 1.13                             | 1.19                             | <0.001          |
| Cataract                        | 55,418   | 37.47    | 1.02                | 1.01                             | 1.04                             | 0.004           |

**Table S4.** Adjusted Cox proportional hazards model for estimating time-adjusted risk of SPV over 6 years for all eligible patient eyes (n = 160,423)

| <b>Risk Factors</b>             | <b>n</b> | <b>%</b> | <b>Hazard ratio</b> | <b>Hazard ratio Lower 95% CI</b> | <b>Hazard ratio Upper 95% CI</b> | <b>P-values</b> |
|---------------------------------|----------|----------|---------------------|----------------------------------|----------------------------------|-----------------|
| <b>Gender</b>                   |          |          |                     |                                  |                                  |                 |
| Female                          | 14,691   | 63.27    | Ref.                | -                                | -                                | -               |
| Male                            | 8,444    | 36.37    | 1.07                | 1.04                             | 1.10                             | <0.001          |
| <b>Race</b>                     |          |          |                     |                                  |                                  |                 |
| Caucasian                       | 132,505  | 89.60    | Ref.                | -                                | -                                | -               |
| Non-Caucasian                   | 15,383   | 10.41    | 1.11                | 1.06                             | 1.16                             | <0.001          |
| <b>Payer Type</b>               |          |          |                     |                                  |                                  |                 |
| Medicare                        | 18,216   | 78.45    | Ref.                | -                                | -                                | -               |
| Commercial                      | 3,440    | 14.81    | 1.04                | 1.00                             | 1.08                             | 0.05            |
| Medicaid                        | 241      | 1.04     | 1.26                | 1.11                             | 1.43                             | <0.001          |
| Other                           | 1,323    | 5.70     | 1.13                | 1.07                             | 1.2                              | <0.001          |
| <b>Physician Subspecialty</b>   |          |          |                     |                                  |                                  |                 |
| Retina Specialist               | 18,789   | 80.92    | Ref.                | -                                | -                                | -               |
| Other                           | 4,431    | 19.08    | 1.23                | 1.18                             | 1.28                             | <0.001          |
| <b>Historical Comorbidities</b> |          |          |                     |                                  |                                  |                 |
| Glaucoma                        | 2,174    | 9.36     | 1.26                | 1.21                             | 1.32                             | <0.001          |
| Cataract                        | 7,117    | 30.65    | 0.92                | 0.89                             | 0.95                             | <0.001          |
